# Supplementary material
Source: PubMed Central journal article supplement (PMC3957837)
Supplement: AAC.02296-13_zac003142672so1.pdf [file AAC.02296-13_zac003142672so1.pdf]

## Supplementary Figures

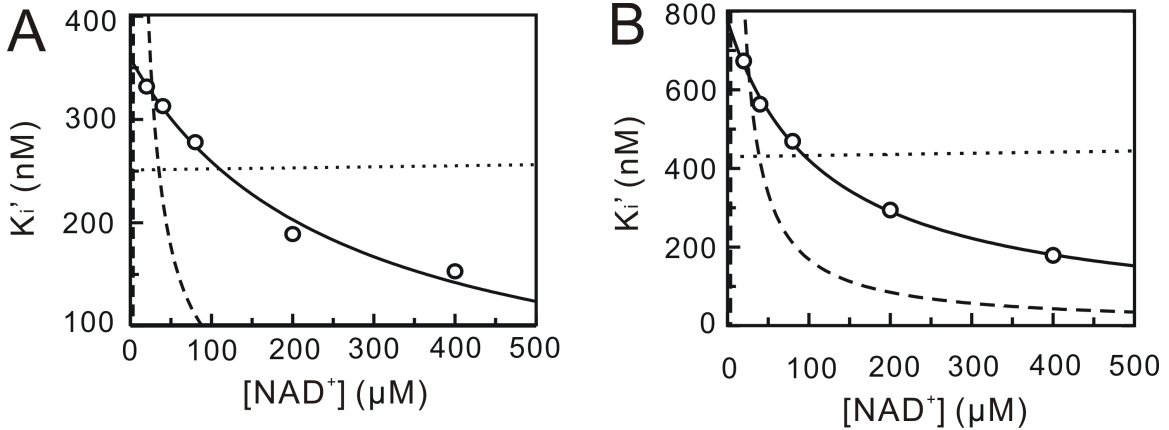

**Figure S1.** Preincubation analysis for the inhibition of bpFabI-1 by PT52 and PT68. **(A)** The effect of NAD<sup>+</sup> on the apparent inhibition constant of PT52. The solid, dashed and dotted lines are the fits of the data to equations in which the inhibitor binds to both E-NADH and E-NAD<sup>+</sup> (solid line), only E-NAD<sup>+</sup> (dashed line) or only E-NADH (dotted line). The best fit (solid line) is obtained using  $K_i' = K_2(1 + [NAD^+]/K_{m'}^{NAD})/[1 + [NAD^+]/(K_{m'}^{NAD} K_1/K_2)]$ , with  $K_1 = 3.69 \pm 0.35$  nM and  $K_2 = 359 \pm 10$  nM. **(B)** The effect of NAD<sup>+</sup> on the apparent inhibition constant of PT68. The solid, dashed and dotted lines are as described in **A**, and the best fit (solid line) is again obtained with the equation in which PT68 binds to both E-NAD<sup>+</sup> and E-NADH with  $K_1 = 6.12 \pm 0.31$  nM and  $K_2 = 776 \pm 17$  nM.

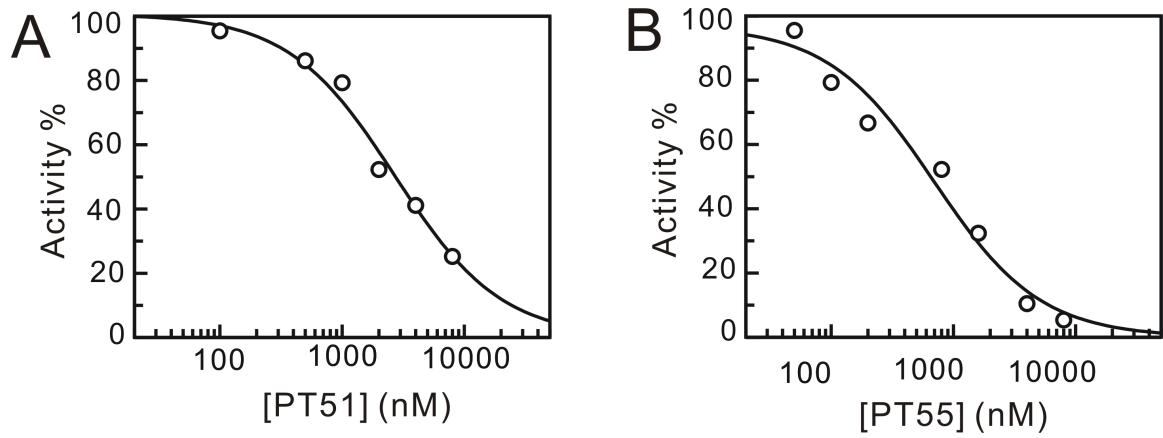

**Figure S2.** Dose-response of bpFabI-1 of PT51 and PT55. **(A)** The IC<sub>50</sub> of PT51 was  $2699 \pm 287$  nM, and **(B)** The IC<sub>50</sub> of PT55 was  $695 \pm 132$  nM.
